# Supplementary material for: A Protein Complex Containing the Conserved Swi2/Snf2-Related ATPase Swr1p Deposits Histone Variant H2A.Z into Euchromatin
Source: PubMed Central journal article supplement (PMC374244; doi:10.1371/journal.pbio.0020131), 2004-03-23

# Supplementary Fig. 1

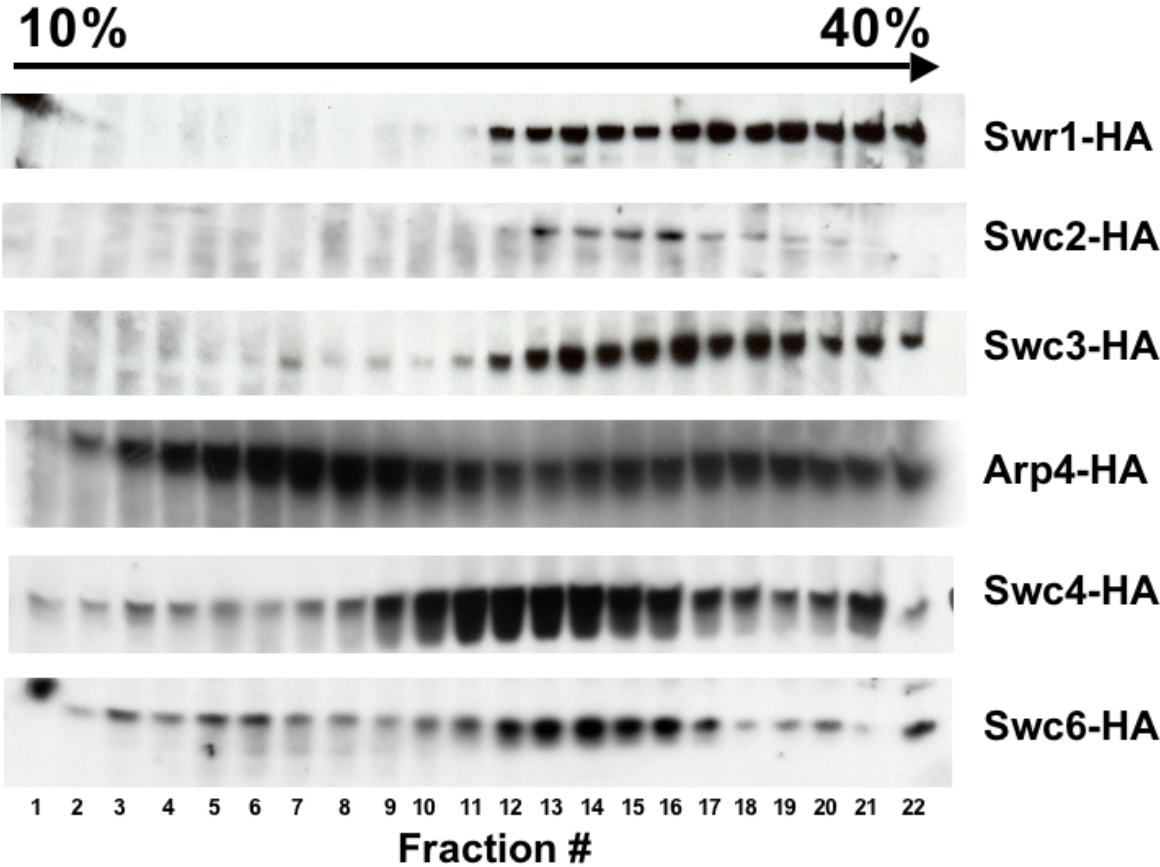

Supplement: pbio.0020131.sg001.pdf [file pbio.0020131.sg001.pdf]
