# Supplementary material for: A Protein Complex Containing the Conserved Swi2/Snf2-Related ATPase Swr1p Deposits Histone Variant H2A.Z into Euchromatin
Source: PubMed Central journal article supplement (PMC374244; doi:10.1371/journal.pbio.0020131), 2004-03-23
Supplement: pbio.0020131.st001.pdf [file pbio.0020131.st001.pdf]

**Supplementary Table 1: Peptides in the Rvb2-TAP purification (SWR1-Com is listed first)**

| <b>Systematic Name</b> | <b>Name</b> | <b>Mass</b> | <b>Rvb2-TAP</b> |
|------------------------|-------------|-------------|-----------------|
| YDR334W                | Swr1        | 174         | 4               |
| YDR485C                | Swc2        | 91          | -               |
| YLR399C                | Bdf1        | 77          | -               |
| YAL011W                | Swc3        | 74          | -               |
| YJL081C                | Arp4        | 55          | 2               |
| YGR002C                | Swc4        | 55          | 2               |
| YPL235W                | Rvb2        | 52          | 8               |
| YDR190C                | Rvb1        | 50          | 13              |
| YFL039C                | Act1        | 42          | 2               |
| YBR231C                | Swc5        | 34          | -               |
| YML041C                | Swc6        | 32          | 1               |
| YNL107W                | Yaf9        | 26          | -               |
| YLR385C                | Swc7        | 15          | 1               |
|                        |             |             |                 |
| YGL150C                | Ino80       | 171         | 9               |
| YFL013C                | Ies1        | 79          | 1               |
| YNL215W                | Ies2        | 36          | 2               |
| YLR052W                | Ies3        | 28          | 3               |
