# Supplementary material for: A Protein Complex Containing the Conserved Swi2/Snf2-Related ATPase Swr1p Deposits Histone Variant H2A.Z into Euchromatin
Source: PubMed Central journal article supplement (PMC374244; doi:10.1371/journal.pbio.0020131), 2004-03-23
Supplement: pbio.0020131.st002.pdf [file pbio.0020131.st002.pdf]

**Supplementary Table 2**  
**Yeast strains used in this study**

| <b>Strain</b> | <b>Relevant Genotype</b>                                          | <b>Source*</b> |
|---------------|-------------------------------------------------------------------|----------------|
| JRY3009       | <i>MATA ade2-1 can1-100 his3-11 leu2-3,112 trp1-1 ura3-1</i>      | A. Kirchmaier  |
| JRY7720       | <i>MATA ade2-1 can1-100 his3-11 leu2-3,112 trp1-1 ura3-1 bar1</i> |                |
| JRY7721       | JRY7520, <i>TRP1::ESAI-TAP<sup>++</sup></i>                       |                |
| JRY7722       | JRY7520, <i>TRP1::YAF9-TAP</i>                                    |                |
| JRY7723       | JRY7520, <i>TRP1::HTZ1-TAP</i>                                    |                |
| JRY7724       | JRY7520, <i>kanMX6::SWR1-HA3</i>                                  |                |
| JRY7725       | JRY7520, <i>kanMX6::SWR1-HA3, TRP1::HTZ1-TAP</i>                  |                |
| JRY7726       | JRY7520, <i>kanMX6::SWR1-HA3, TRP1::HTA1-TAP</i>                  |                |
| JRY7727       | JRY7520, <i>kanMX6::SWR1-HA3, TRP1::YAF9-TAP</i>                  |                |
| JRY7728       | JRY7520, <i>kanMX6::SWC2-HA3</i>                                  |                |
| JRY7729       | JRY7520, <i>kanMX6::SWC2-HA3, TRP1::HTZ1-TAP</i>                  |                |
| JRY7730       | JRY7520, <i>kanMX6::SWC2-HA3, TRP1::HTA1-TAP</i>                  |                |
| JRY7731       | JRY7520, <i>kanMX6::SWC2-HA3, TRP1::YAF9-TAP</i>                  |                |
| JRY7732       | JRY7520, <i>kanMX6::SWC3-HA3</i>                                  |                |
| JRY7733       | JRY7520, <i>kanMX6::SWC3-HA3, TRP1::HTZ1-TAP</i>                  |                |
| JRY7734       | JRY7520, <i>kanMX6::SWC3-HA3, TRP1::HTA1-TAP</i>                  |                |
| JRY7735       | JRY7520, <i>kanMX6::SWC3-HA3, TRP1::YAF9-TAP</i>                  |                |
| JRY7736       | JRY7520, <i>kanMX6::SWC4-HA3</i>                                  |                |
| JRY7737       | JRY7520, <i>kanMX6::SWC4-HA3, TRP1::HTZ1-TAP</i>                  |                |
| JRY7738       | JRY7520, <i>kanMX6::SWC4-HA3, TRP1::HTA1-TAP</i>                  |                |
| JRY7739       | JRY7520, <i>kanMX6::SWC4-HA3, TRP1::YAF9-TAP</i>                  |                |
| JRY7740       | JRY7520, <i>kanMX6::SWC7-HA3</i>                                  |                |
| JRY7741       | JRY7520, <i>kanMX6::SWC7-HA3, TRP1::HTZ1-TAP</i>                  |                |
| JRY7742       | JRY7520, <i>kanMX6::SWC7-HA3, TRP1::HTA1-TAP</i>                  |                |
| JRY7743       | JRY7520, <i>kanMX6::SWC7-HA3, TRP1::YAF9-TAP</i>                  |                |
| JRY7744       | JRY7520, <i>kanMX6::KAP114-HA3</i>                                |                |
| JRY7745       | JRY7520, <i>kanMX6::KAP114-HA3, TRP1::HTZ1-TAP</i>                |                |
| JRY7746       | JRY7520, <i>kanMX6::KAP114-HA3, TRP1::HTA1-TAP</i>                |                |
| JRY7747       | JRY7520, <i>kanMX6::KAP114-HA3, TRP1::YAF9-TAP</i>                |                |
| JRY7748       | JRY7520, <i>TRP1::SWC4-TAP</i>                                    |                |
| JRY7749       | JRY7520, <i>TRP1::SWR1-TAP</i>                                    |                |
| JRY7750       | JRY7520, <i>TRP1::RVB2-TAP</i>                                    |                |
| JRY7751       | JRY3009, <i>yaf9::his5MX6</i>                                     |                |
| JRY7752       | JRY3009, <i>swr1::his5MX6</i>                                     |                |
| JRY7753       | JRY3009, <i>swc2::his5MX6</i>                                     |                |
| JRY7754       | JRY3009, <i>htz1::his5MX6</i>                                     |                |
| JRY7755       | JRY7520, <i>kanMX6::SWC4-HA3, TRP1::SWR1-TAP</i>                  |                |
| JRY7756       | JRY7520, <i>kanMX6::SWC4-HA3, TRP1::ESAI-TAP</i>                  |                |
| JRY7757       | JRY7520, <i>kanMX6::SWC4-HA3, TRP1::RVB2-TAP</i>                  |                |
| JRY7758       | JRY7520, <i>kanMX6::SWC4-HA3, TRP1::INO80-TAP</i>                 |                |
| JRY7759       | JRY7520, <i>his5MX6::HTZ1-HA3</i>                                 |                |
| JRY7760       | JRY7520, <i>his5MX6::HTZ1-HA3, TRP1::SWR1-TAP</i>                 |                |
| JRY7761       | JRY7520, <i>his5MX6::HTB1-HA3</i>                                 |                |
| JRY7762       | JRY7520, <i>his5MX6::HTB1-HA3, TRP1::SWR1-TAP</i>                 |                |
| JRY7763       | JRY3009, <i>eaf1::his5MX6</i>                                     |                |
| JRY7764       | JRY7520, <i>kanMX6::EAF1-HA3</i>                                  |                |
| JRY7765       | JRY7520, <i>kanMX6::EAF1-HA3, TRP1::HTZ1-TAP</i>                  |                |
| JRY7766       | JRY7520, <i>kanMX6::EAF1-HA3, TRP1::YAF9-TAP</i>                  |                |
| JRY7767       | JRY7520, <i>kanMX6::EAF1-HA3, TRP1::SWC4-TAP</i>                  |                |
| JRY7768       | JRY7520, <i>kanMX6::EAF1-HA3, TRP1::SWR1-TAP</i>                  |                |
| JRY7769       | JRY7520, <i>kanMX6::EAF1-HA3, TRP1::ESAI-TAP</i>                  |                |

JRY7770 JRY7520, *his5MX6::SWC3-HA3, kanMX6::SWR1-3HA, TRP1::YAF9-TAP*  
 JRY7771 JRY7520, *his5MX6::HTZ1-HA3, kanMX6::SWC4-3HA, TRP1::YAF9-TAP*  
 JRY7772 JRY7520, *his5MX6::SWC6-HA3, kanMX6::SWC2-3HA, TRP1::YAF9-TAP*

|        |                                                                                                                                                                   |                   |
|--------|-------------------------------------------------------------------------------------------------------------------------------------------------------------------|-------------------|
| YM1769 | <i>MAT<math>\alpha</math> his3<math>\Delta</math>1 leu2<math>\Delta</math>0 ura3<math>\Delta</math>0 lys2<math>\Delta</math>0</i>                                 | Research Genetics |
| YM1823 | <i>MAT<math>\alpha</math> swr1<math>\Delta</math>::kanMX6 his3<math>\Delta</math>1 leu2<math>\Delta</math>0 ura3<math>\Delta</math>0 lys2<math>\Delta</math>0</i> | Research Genetics |
| YM1844 | <i>MAT<math>\alpha</math> his3 leu2 ura3 lys2 HA3-HTZ1::URA3::htz1::kanMX3</i>                                                                                    |                   |
| YM1845 | <i>MAT<math>\alpha</math> his3 leu2 ura3 lys2 HA3-HTZ1::URA3::htz1::kanMX3<br/>swr1::his5MX6</i>                                                                  |                   |

\* unless otherwise indicated, all strains were constructed for this work (details available upon request) or were from the laboratory collections. Strains JRY3009-JRY7550 are in the W303 background, strains YM1769-YM1845 are in the S288C background.

<sup>++</sup> this nomenclature indicates the selectable marker, in this case *TRP1*, used to insert the tagged gene, in this case *ESAI-TAP*, at that locus, in this case *ESAI*
