# Supplementary material for: A Protein Complex Containing the Conserved Swi2/Snf2-Related ATPase Swr1p Deposits Histone Variant H2A.Z into Euchromatin
Source: PubMed Central journal article supplement (PMC374244; doi:10.1371/journal.pbio.0020131), 2004-03-23
Supplement: pbio.0020131.st003.pdf [file pbio.0020131.st003.pdf]

### Supplementary Table 3

#### ChIP oligos

| Primer set | Oligo sequences                             |
|------------|---------------------------------------------|
| KCC4       | AACGCAGTCTTAGTAAAAGG / GTTCTATGGCCCGTGCGCTC |
| NFS1       | TGATAAGCATGGCTCATTGC / GCATACACGAAGGAACTGCT |
| SGF29      | CCAGTACGATCTGCCAACTT / TACAATGCCAACGAGGTCAT |
| CDC10      | AATAGGCTCCCAAGCTTTAG / TTTGATACCATCACGAATCA |
| SRD1       | ACAAAATAACTGCAAAGTT / AGACTGAAGAAGGAGAATGA  |
| YCR024C    | TATTTGTGAGTGGAATAACT / AAAGAAAACGTACCACAATT |
| SNT1       | GCTATTTGGTACTAGGCATC / AAGTCAATAGTAATCCGAAT |
| BUD31      | TCTGCCCGCGCTGGTTCAA / TGAGGTGAGCTTTGCTAGTC  |
| YCR072C    | TCTTCTGTACTGTTATAGCC / GGCTCAACTTCCCAGAGAAG |
| YCR079W    | CTAATGCGTATGGAAGTGCC / GTCCAAGGATCGCACTATCG |
| ABP1       | ATCTATAAACAAACAATCGC / CTTCTCAACGTCTGACCCTG |
| YCR090C    | AACGAAGAATAAATTTGAA / TATTTCCATGATTCACCTGCG |
